# Supplementary material for: Analgesic efficacy of preemptive local wound infiltration plus laparoscopic-assisted transversus abdominis plane block versus wound infiltration in patients undergoing laparoscopic colorectal resection: study protocol for a randomized, multicenter, single-blind, noninferiority trial
Source: PubMed Central journal article supplement (PMC6604482; doi:10.1186/s13063-019-3509-y), 2019-07-02
Supplement: 13063_2019_3509_MOESM2_ESM.pdf [file 13063_2019_3509_MOESM2_ESM.pdf]

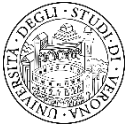

## Laparoscopic ColoRectal Surgery L-TAP-block plus Wound infiltration Vs. Wound infiltration only 2018 DATA COLLECTION FORM

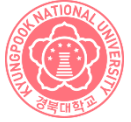

### PATIENT INFORMATION *(to be completed at the admission)*

Name \_\_\_\_\_ Identification code: \_\_\_\_\_ DOB (dd/mm/yyyy): \_\_\_/\_\_\_/\_\_\_\_\_  
 Sex:  Male  Female Age: \_\_\_\_\_ Weight: \_\_\_\_\_ kg Height: \_\_\_\_\_ cm BMI: \_\_\_\_\_ Smoker  Yes  No  
 Race(s):  White  Black/African  Asian  Indian  Other Alcohol abuse  Yes  No Drug addiction  Yes  No  
 Diabetes  Yes  No Dyslipidemia  Yes  No Hypertension  Yes  No Cardiovascular Disease  Yes  No  
 Chronic Kidney Disease  Yes  No Other  Yes  No *If yes specify* \_\_\_\_\_  
 ASA score  1  2  3  4  
 Previous abdominal surgery  Yes  No *If yes specify* \_\_\_\_\_  
 Chronic analgesics  Yes  No *If yes specify*:  NSAID  Opioid  Paracetamol  
*Specify drug and dose* \_\_\_\_\_

### PROCEDURE INFORMATION *(to be completed by the surgeon at the time of surgery)*

Date of Surgery (dd/mm/yyyy): \_\_\_/\_\_\_/\_\_\_\_\_  
 Indication to surgery  Diverticular disease  Colon cancer  Rectal Cancer  
 Colon Cancer site  Cecum  Ascending  Hepatic flexure  Transverse colon  Splenic flexure  Descending  
 Sigmoid  Upper Rectum  Lower Rectum  
 Metastasis  Yes  No *If yes specify*: \_\_\_\_\_ Neoadjuvant radiochemotherapy  Yes  No  
 Procedure:  Rt Hemicol  Extended Rt Hemicol  Lt Colectomy  Lt Hemicol  AR  LAR  Other \_\_\_\_\_  
 Stoma  Colostomy  Ileostomy  No  
 Contemporary visceral resection  Yes  No *If yes specify*: \_\_\_\_\_  
 Port number (including optical): \_\_\_\_\_ Minilaparotomy:  Suprapubic  Periumbilical  Other: \_\_\_\_\_  
 Length of minilaparotomy (cm) \_\_\_\_\_ Drain(s)  Yes  No Anesthesia time (mins) \_\_\_\_\_ Surgery time (mins) \_\_\_\_\_  
 Intraoperative complications  Yes  No *If yes specify*: \_\_\_\_\_ Blood loss (ml) \_\_\_\_\_  
 Pneumoperitoneum pressure (mmHg) \_\_\_\_\_ Total CO2 volume (liters) \_\_\_\_\_  
 Regional analgesia  TAP-block + Wound infiltration\*  Wound infiltration\*\*  At the beginning  At the end of surgery  
*(to be completed by the surgeon in a separated database blinded to other research collaborators)*  
 Intraoperative analgesic drugs (drug and dose) \_\_\_\_\_  
 Intraoperative antiemetic drugs (drug and dose) \_\_\_\_\_

\*TAP-block+WI: 0.25% ropivacaine 20ml each side TAP (total 40ml) + WI 0.25% ropivacaine 10 ml for mini-laparotomy and 2.5 ml for each of 4 trocar incisions

\*\*WI: 0.375% ropivacaine 40ml (20ml for mini-laparotomy and 5ml for each of 4 trocar incision)

### POST-OPERATIVE INFORMATION *(to be completed by research collaborator blinded to regional analgesia type)*

| Post-op. | NRS score <i>(highest score between at rest or coughing)</i>                                                                                                                                                                                                                                              | PONV score*                                                                      |
|----------|-----------------------------------------------------------------------------------------------------------------------------------------------------------------------------------------------------------------------------------------------------------------------------------------------------------|----------------------------------------------------------------------------------|
| 4-6 h    | <input type="checkbox"/> 0 <input type="checkbox"/> 1 <input type="checkbox"/> 2 <input type="checkbox"/> 3 <input type="checkbox"/> 4 <input type="checkbox"/> 5 <input type="checkbox"/> 6 <input type="checkbox"/> 7 <input type="checkbox"/> 8 <input type="checkbox"/> 9 <input type="checkbox"/> 10 | <input type="checkbox"/> 0 <input type="checkbox"/> 1 <input type="checkbox"/> 2 |
| 12 h     | <input type="checkbox"/> 0 <input type="checkbox"/> 1 <input type="checkbox"/> 2 <input type="checkbox"/> 3 <input type="checkbox"/> 4 <input type="checkbox"/> 5 <input type="checkbox"/> 6 <input type="checkbox"/> 7 <input type="checkbox"/> 8 <input type="checkbox"/> 9 <input type="checkbox"/> 10 | <input type="checkbox"/> 0 <input type="checkbox"/> 1 <input type="checkbox"/> 2 |
| 24 h     | <input type="checkbox"/> 0 <input type="checkbox"/> 1 <input type="checkbox"/> 2 <input type="checkbox"/> 3 <input type="checkbox"/> 4 <input type="checkbox"/> 5 <input type="checkbox"/> 6 <input type="checkbox"/> 7 <input type="checkbox"/> 8 <input type="checkbox"/> 9 <input type="checkbox"/> 10 | <input type="checkbox"/> 0 <input type="checkbox"/> 1 <input type="checkbox"/> 2 |
| 48 h     | <input type="checkbox"/> 0 <input type="checkbox"/> 1 <input type="checkbox"/> 2 <input type="checkbox"/> 3 <input type="checkbox"/> 4 <input type="checkbox"/> 5 <input type="checkbox"/> 6 <input type="checkbox"/> 7 <input type="checkbox"/> 8 <input type="checkbox"/> 9 <input type="checkbox"/> 10 | <input type="checkbox"/> 0 <input type="checkbox"/> 1 <input type="checkbox"/> 2 |
| 72 h     | <input type="checkbox"/> 0 <input type="checkbox"/> 1 <input type="checkbox"/> 2 <input type="checkbox"/> 3 <input type="checkbox"/> 4 <input type="checkbox"/> 5 <input type="checkbox"/> 6 <input type="checkbox"/> 7 <input type="checkbox"/> 8 <input type="checkbox"/> 9 <input type="checkbox"/> 10 | <input type="checkbox"/> 0 <input type="checkbox"/> 1 <input type="checkbox"/> 2 |

\*PONV score: 0 no nausea/vomiting; 1 nausea; 2 vomiting  
 \*\* intravenous infusion of 100 mg Tramadol (T) or 30 mg Ketorolac (K)  
 \*\*\* DDD: 100 mg Tramadol = 1/3 DDD (1 DDD= 300 mg) 30 mg Ketorolac = 1 DDD



**Laparoscopic ColoRectal Surgery  
L-TAP-block plus Wound infiltration Vs. Wound infiltration only  
2018 DATA COLLECTION FORM**



| Paracetamol routine doses                                                                                                   | Rescue doses ( <i>kind and dosing</i> )**                                                                                                                                                        |
|-----------------------------------------------------------------------------------------------------------------------------|--------------------------------------------------------------------------------------------------------------------------------------------------------------------------------------------------|
| Day 0 (0-24 h) <input type="checkbox"/> 1 <input type="checkbox"/> 2 <input type="checkbox"/> 3 <input type="checkbox"/> 4  | Day 0 (0-24 h)    T 100mg <input type="checkbox"/> 1 <input type="checkbox"/> 2 <input type="checkbox"/> 3<br>K 30mg <input type="checkbox"/> 1 <input type="checkbox"/> 2    ***Total DDD_____  |
| Day 1 (24-48 h) <input type="checkbox"/> 1 <input type="checkbox"/> 2 <input type="checkbox"/> 3 <input type="checkbox"/> 4 | Day 1 (24-48 h)    T 100mg <input type="checkbox"/> 1 <input type="checkbox"/> 2 <input type="checkbox"/> 3<br>K 30mg <input type="checkbox"/> 1 <input type="checkbox"/> 2    ***Total DDD_____ |
| Day 2 (48-72 h) <input type="checkbox"/> 1 <input type="checkbox"/> 2 <input type="checkbox"/> 3 <input type="checkbox"/> 4 | Day 2 (48-72 h)    T 100mg <input type="checkbox"/> 1 <input type="checkbox"/> 2 <input type="checkbox"/> 3<br>K 30mg <input type="checkbox"/> 1 <input type="checkbox"/> 2    ***Total DDD_____ |
| Day 3 (72-96 h) <input type="checkbox"/> 1 <input type="checkbox"/> 2 <input type="checkbox"/> 3 <input type="checkbox"/> 4 | Day 3 (72-96 h)    T 100mg <input type="checkbox"/> 1 <input type="checkbox"/> 2 <input type="checkbox"/> 3<br>K 30mg <input type="checkbox"/> 1 <input type="checkbox"/> 2    ***Total DDD_____ |

**Prolonged postoperative ileus** (*lack of intestine movement more than 3 days following surgery*)  Yes  No

**Complications:**  SSI    Intra-abdominal abscess    Bleeding requiring transfusion/operative hemostasis    Anastomotic leak  
 Other surgical \_\_\_\_\_    General complications\* \_\_\_\_\_

Reoperation (*within hospital stay*)    Mortality

\* pulmonary, cardiac, thromboembolic

**Clavien-Dindo classification:** \_\_\_\_\_

**Time to first flatus** (days): \_\_\_\_\_    **Time to stools** (days): \_\_\_\_\_    **Time to drain(s) removal** (days): \_\_\_\_\_

**Time to liquid diet** (days): \_\_\_\_\_    **Time to soft diet** (days): \_\_\_\_\_    **Time to discharge** (days): \_\_\_\_\_.

**Sitting on chair** (hours) \_\_\_\_\_    **Walking** (hours) \_\_\_\_\_

**30 days Readmission**  Yes  No

**HISTOPATHOLOGICAL INFORMATION**

**Histologic type:**  Adenocarcinoma    Mucinous    Other (*specify*): \_\_\_\_\_    **Grade:**  G1    G2    G3

**Maximum tumor diameter:** \_\_\_\_\_ cm    **pT:**  pTX    pT0    pTis    pT1    pT2    pT3    pT4    **pN:**  pNX    pT0    pT1    pT2

**Regional lymph nodes:** n° examined: \_\_\_\_\_ n° involved: \_\_\_\_\_    **pM:**  pM0    pM1    **Stage:**  0    1    2    3    4

**R:**  R0    R1    R2    **Distance of carcinoma:** From proximal margin \_\_\_\_\_ cm;    From distal margin: \_\_\_\_\_ cm;

**Circumferential margin** (if applicable): \_\_\_\_\_ mm    **Tumour budding:**  Yes    No    **Vascular invasion:**  Yes    No
